# Supplementary material for: Influenza vaccination and the risk of COVID-19 infection and severe illness in older adults in the United States
Source: PubMed Central journal article supplement (PMC8155195; doi:10.1038/s41598-021-90068-y), 2021-05-26
Supplement: 41598_2021_90068_MOESM1_ESM.pdf [file 41598_2021_90068_MOESM1_ESM.pdf]

**Influenza Vaccination and the Risk of COVID-19 Infection and Severe Illness in Older Adults in the United States**

Kelly Huang, Shu-Wen Lin, Wang-Huei Sheng, Chi-Chuan Wang

**Supplementary Information**

**Table S1. Definition and coding of diseases**

| Item                    | Definition                                                                       | Coding system | Code                    |
|-------------------------|----------------------------------------------------------------------------------|---------------|-------------------------|
| COVID-19 infection      | Dx: Coronavirus infection                                                        | ICD-10        | B34.2, B97.29           |
|                         | Dx: SARS-associated coronavirus                                                  | ICD-10        | B97.21, J12.81          |
|                         | Dx: COVID-19                                                                     | ICD-10        | U07.1, U07.2            |
|                         | Dx: Exposure to other viral communicable diseases                                | ICD-10        | Z20.828                 |
| Severe COVID-19 illness | Pcs: Mechanical ventilation                                                      | CPT           | 31500, 1015098, 1022227 |
| Risk factors            |                                                                                  |               |                         |
| Asthma                  | Dx: Moderate to severe asthma                                                    | ICD-10        | J45.4, J45.5            |
| CKD with dialysis       | Pcs: Dialysis                                                                    | CPT           | 90935, 90937            |
| Chronic lung disease    | Dx: COPD                                                                         | ICD-10        | J44.9                   |
| Diabetes                | Dx: Diabetes                                                                     | ICD-10        | E08-E13                 |
| Hemoglobin disorder     | Dx: Thalassemia, sickle cell disease                                             | ICD-10        | D56, D57                |
| Immunocompromised       | Dx: Human immunodeficiency virus disease                                         | ICD-10        | B20                     |
|                         | Pcs: Cluster of differentiation 4 receptors test                                 | CPT           | 86359, 86360, 86361     |
|                         | Dx: Immunodeficiency                                                             | ICD-10        | D83                     |
|                         | Dx: Transplant                                                                   | ICD-10        | Z94                     |
| Liver disease           | Dx: Cirrhosis, chronic hepatic failure                                           | ICD-10        | K72-K74                 |
| Serious heart condition | Dx: Heart failure, chronic ischemic heart disease, pulmonary circulation disease | ICD-10        | I50, I25-I28            |
| Severe obesity          | Dx: Obesity                                                                      | ICD-10        | E66                     |

Dx, diagnosis; Pcs, procedure; ICD-10, International Classification of Disease, 10<sup>th</sup> revision;

CPT, Current Procedural Terminology; COVID-19, coronavirus disease 2019; SARS, severe acute respiratory syndrome; CKD, chronic kidney disease; COPD, chronic obstructive pulmonary disease.

**Figure S1. The distribution of odds ratio in 2000 subcohorts**

(Left: odds ratio; middle: lower limit of 95% confidence interval; right: upper limit of 95% confidence interval)
