# Supplementary material for: Influenza vaccination and the risk of COVID-19 infection and severe illness in older adults in the United States
Source: PubMed Central journal article supplement (PMC8155195; doi:10.1038/s41598-021-90068-y), 2021-05-26

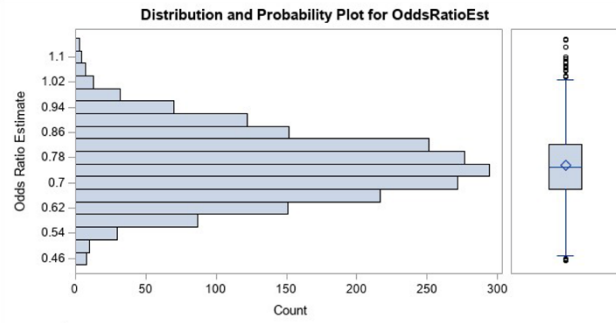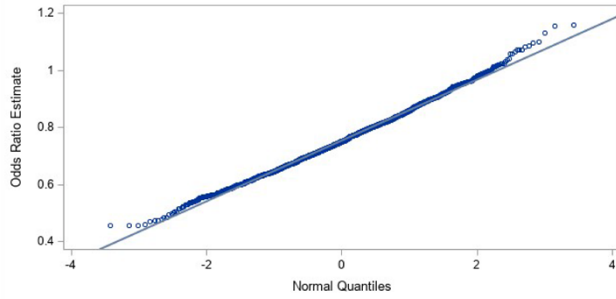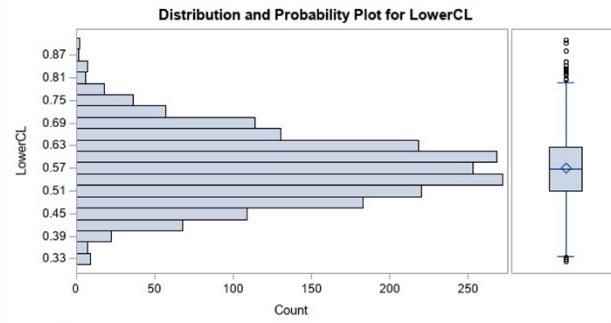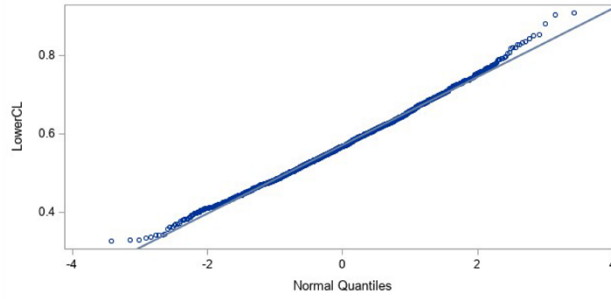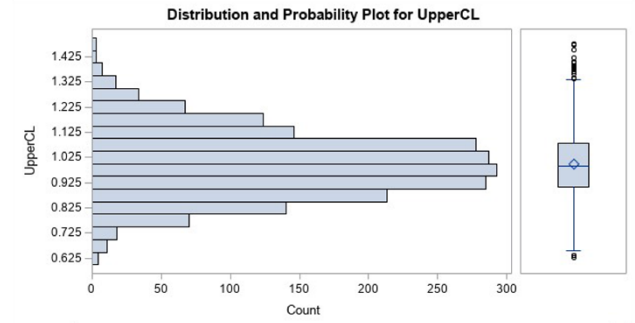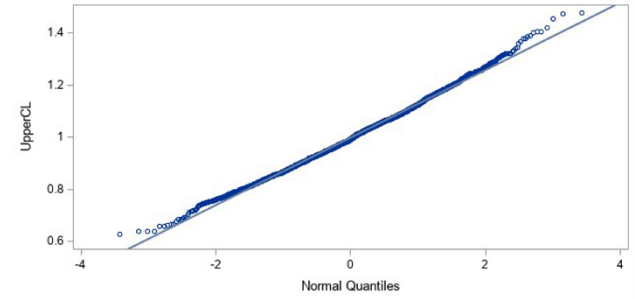

Supplement: 41598_2021_90068_MOESM2_ESM.pdf [file 41598_2021_90068_MOESM2_ESM.pdf]
